# Supplementary material for: A facile surface alloy-engineering route to enable robust lithium metal anodes
Source: Royal Society of Chemistry journal article supplement (doi:10.1039/d1cp04920h), 2022-01-01
Supplement: d1cp04920h1.pdf [file d1cp04920h1.pdf]

## **A facile surface alloy-engineering route to enable robust lithium metal anode**

*Xiaobin Liao<sup>a</sup>, Qian Liu<sup>a</sup>, Xiaolin Liu<sup>a</sup>, Shaohua Zhu<sup>c</sup>, Kangning Zhao<sup>c,\*</sup>, Yan Zhao<sup>a,b,\*</sup>*

<sup>a</sup>State Key Laboratory of Silicate Materials for Architectures, International School of Materials Science and Engineering, Wuhan University of Technology, No. 122 Luoshi Road, Wuhan 430070, People's Republic of China.

<sup>b</sup>The Institute of Technological Sciences, Wuhan University, Hubei, Wuhan 430072, People's Republic of China.

<sup>c</sup>State Key Laboratory of Advanced Technology for Materials Synthesis and Processing, International School of Materials Science and Engineering, Wuhan University of Technology, Wuhan 430070, China.

\*Corresponding Authors:

E-mail addresses: kangning.zhao@epfl.ch (K. Zhao), yan2000@whut.edu.cn (Y. Zhao)

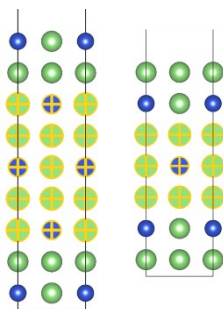

Figure S1. The two types of exposed  $\text{Li}_3\text{Cu}$  (001) surfaces. The atomic layers in bulk were constrained and only the atoms at top two layers were free to relax. The green atoms are Li, and the blue atoms are Cu.

Table S1. The calculated data of the surface energy of  $\text{Li}_3\text{Cu}$ .

|                        | Bulk   | Surface area<br>$\text{\AA}^2$ | $E_{\text{unrel}}$ | $E_{\text{rel}}$ | $\frac{1}{2} \Delta E$ | $\sigma$ | $E_{\text{surface}}(\mu\text{Li})$<br>$\text{J/m}^2$ |       |
|------------------------|--------|--------------------------------|--------------------|------------------|------------------------|----------|------------------------------------------------------|-------|
| $\text{Li}_3\text{Cu}$ | 001    | 16.17                          | -41.56             | -41.86           | -0.15                  | 24.44    | 24.22                                                |       |
|                        |        |                                | -41.56             | -41.86           | -0.15                  | 24.44    | 24.22                                                |       |
|                        |        |                                | -40.41             | -40.57           | -0.08                  | 19.43    | 19.24                                                |       |
|                        | 100    | 30.13                          | -82.43             | -82.83           | -0.20                  | 43.67    | 23.22                                                |       |
|                        |        |                                | -82.43             | -82.83           | -0.20                  | 43.67    | 23.22                                                |       |
|                        | -18.91 | 110                            | 22.12              | -41.02           | -41.26                 | -0.12    | 24.74                                                | 17.92 |
|                        | -41.02 |                                |                    | -41.26           | -0.12                  | 24.74    | 17.92                                                |       |
|                        | -40.13 |                                |                    | -40.19           | -0.03                  | 19.62    | 14.21                                                |       |
|                        | 111    | 48.36                          | -76.38             | -76.92           | -0.27                  | 44.73    | 14.82                                                |       |
|                        |        |                                | -75.38             | -75.69           | -0.15                  | 39.68    | 13.15                                                |       |

Table S2. The calculated data of the surface energy of  $\text{Li}_3\text{Ga}$ .

|                        | Bulk | Surface area<br>$\text{\AA}^2$ | $E_{\text{unrel}}$ | $E_{\text{rel}}$ | $\frac{1}{2} \Delta E$ | $\sigma$ | $E_{\text{surface}}(\mu\text{Li})$<br>$\text{J/m}^2$ |
|------------------------|------|--------------------------------|--------------------|------------------|------------------------|----------|------------------------------------------------------|
| $\text{Li}_3\text{Ga}$ | 001  | 40.21                          | -82.03             | -82.33           | -0.15                  | 145.10   | 57.81                                                |
|                        |      |                                | -82.03             | -82.33           | -0.15                  | 145.10   | 57.81                                                |
|                        |      |                                | -81.32             | -81.46           | -0.07                  | 115.11   | 45.86                                                |
|                        | 110  | 28.44                          | -82.80             | -83.03           | -0.11                  | 129.54   | 72.98                                                |
|                        |      |                                | -82.80             | -83.03           | -0.11                  | 129.54   | 72.98                                                |
|                        | 111  | 80.43                          | -98.82             | -99.31           | -0.25                  | 174.63   | 34.78                                                |
| -116.01                |      |                                | -116.25            | -0.12            | 234.60                 | 46.73    |                                                      |

Table S3. The calculated data of the surface energy of Li<sub>3</sub>Mg.

|                    | Bulk   | Surface area<br>Å <sup>2</sup> | E <sub>unrel</sub> | E <sub>rel</sub> | ½ ΔE   | σ      | E <sub>surface</sub> (μLi)<br>J/m <sup>2</sup> |       |       |
|--------------------|--------|--------------------------------|--------------------|------------------|--------|--------|------------------------------------------------|-------|-------|
| Li <sub>3</sub> Mg | -14.68 | 001                            | 37.06              | -63.77           | -63.79 | -0.01  | 34.18                                          | 14.77 |       |
|                    |        |                                |                    |                  |        |        |                                                |       |       |
|                    |        |                                |                    |                  | -41.45 | -41.68 | -0.12                                          | 23.21 | 12.20 |
|                    |        | 100                            | 30.48              | -47.99           | -48.07 | -0.04  | 30.91                                          | 16.25 |       |
|                    |        |                                |                    |                  | -56.42 | -56.44 | -0.02                                          | 30.50 | 16.03 |
|                    |        |                                |                    |                  |        |        |                                                |       |       |
|                    |        | 110                            | 52.79              | -61.24           | -61.41 | -0.08  | 38.92                                          | 11.81 |       |
|                    |        |                                |                    | -62.80           | -62.95 | -0.08  | 31.05                                          | 9.42  |       |
|                    |        | 111                            | 62.12              | -61.31           | -61.40 | -0.04  | 35.38                                          | 9.12  |       |

Table S4. The calculated data of the surface energy of Li<sub>3</sub>Zn.

|                    | Bulk   | Surface area<br>Å <sup>2</sup> | E <sub>unrel</sub> | E <sub>rel</sub> | ½ ΔE   | σ      | E <sub>surface</sub> (μLi)<br>J/m <sup>2</sup> |       |       |
|--------------------|--------|--------------------------------|--------------------|------------------|--------|--------|------------------------------------------------|-------|-------|
| Li <sub>3</sub> Zn | -14.47 | 001                            | 32.94              | -62.76           | -62.81 | -0.02  | 33.70                                          | 16.39 |       |
|                    |        |                                |                    |                  |        |        |                                                |       |       |
|                    |        |                                |                    |                  | -46.95 | -47.17 | -0.11                                          | 30.49 | 18.20 |
|                    |        | 100                            | 26.85              | -54.91           | -55.60 | -0.70  | 29.72                                          | 17.73 |       |
|                    |        |                                |                    |                  |        |        |                                                |       |       |
|                    |        |                                |                    |                  | -59.87 | -60.14 | -0.13                                          | 38.48 | 13.25 |
|                    |        | 110                            | 46.50              | -62.30           | -62.66 | -0.18  | 30.33                                          | 10.45 |       |
|                    |        | 111                            | 54.82              | -60.33           | -60.76 | -0.22  | 34.72                                          | 10.15 |       |

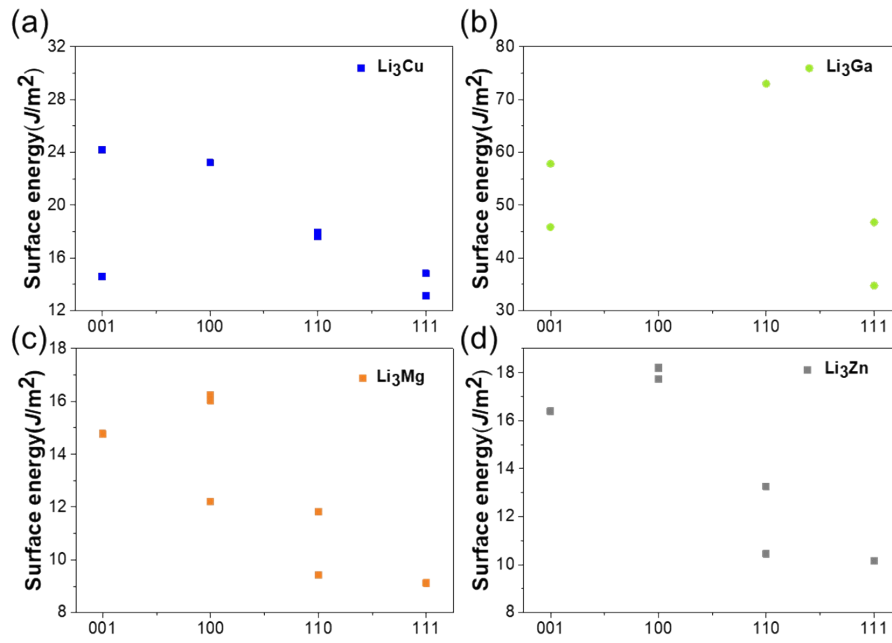

Figure S2. The graph results of the surface energies of  $\text{Li}_3\text{Cu}$ ,  $\text{Li}_3\text{Ga}$ ,  $\text{Li}_3\text{Mg}$  and  $\text{Li}_3\text{Zn}$ .

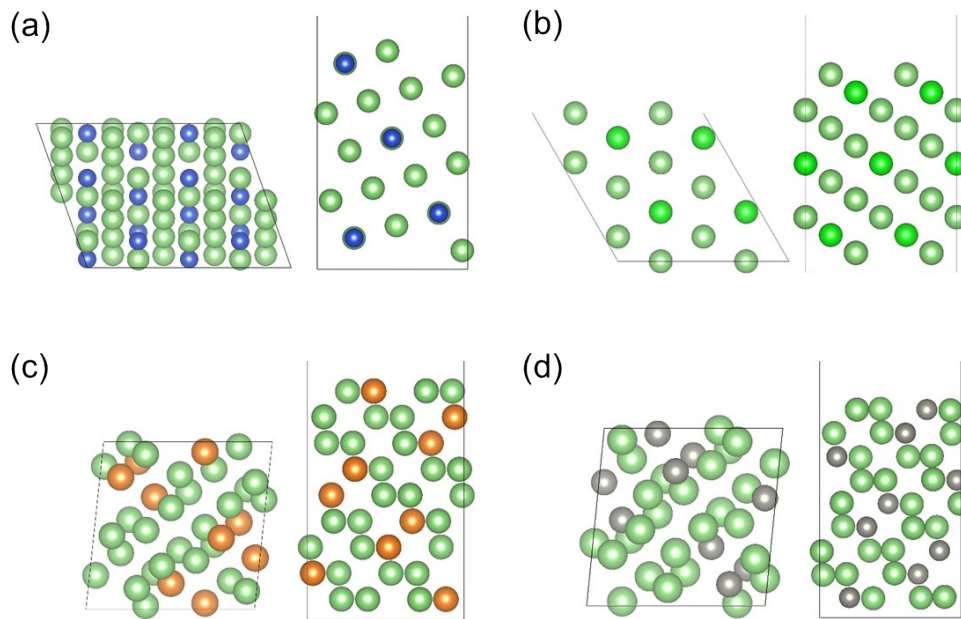

Figure S3. The optimized  $\text{Li}_3\text{Cu}$  (111) (a),  $\text{Li}_3\text{Ga}$  (111) (b),  $\text{Li}_3\text{Mg}$  (111) (c) and  $\text{Li}_3\text{Zn}$  (111) surface (d). The green atoms are Li, blue atoms are Cu, cyan atoms are Ga, brown atoms are Mg and grey atoms are Zn.

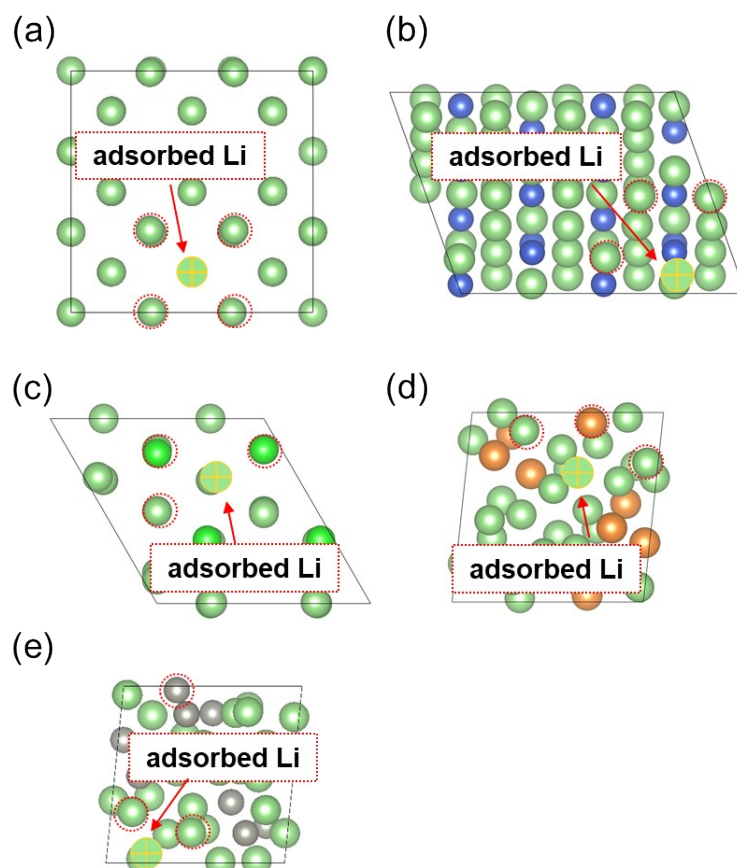

Figure S4. Li atom adsorbed on the pure Li (001) (a),  $\text{Li}_3\text{Cu}$  (111) (b),  $\text{Li}_3\text{Ga}$  (111) (c),  $\text{Li}_3\text{Mg}$  (111) (d) and  $\text{Li}_3\text{Zn}$  (111) surfaces (e). The green atoms are Li, blue atoms are Cu, cyan atoms are Ga, brown atoms are Mg and grey atoms are Zn.

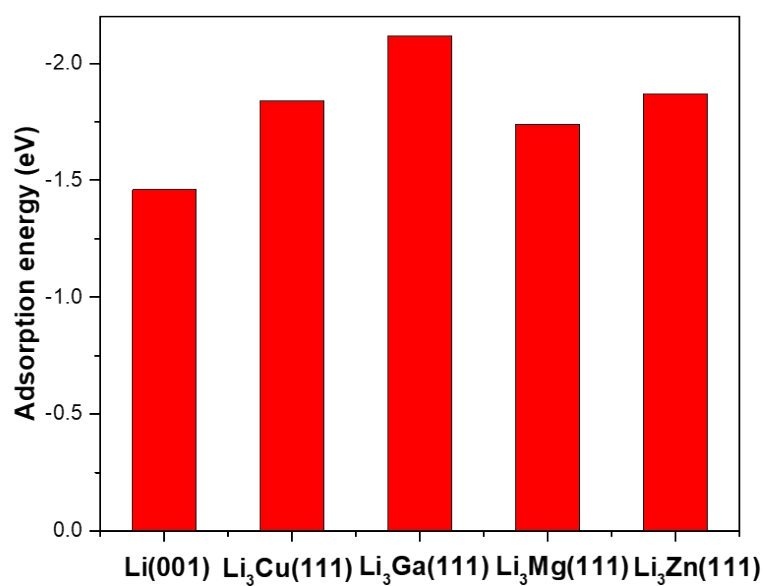

Figure S5. The highest adsorption energy for the Li atom adsorbed at the pure Li metal and Li alloy surfaces.

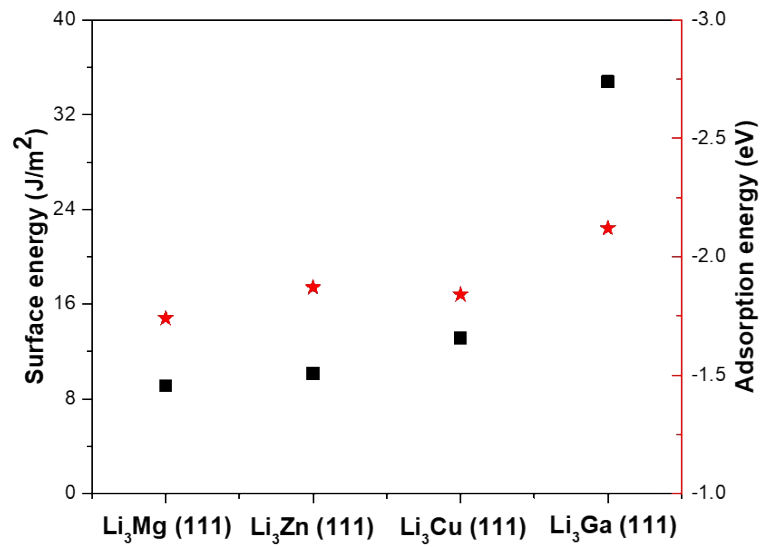

Figure S6. The scatter plot of the surface energy vs. adsorption energy at different alloy surfaces.

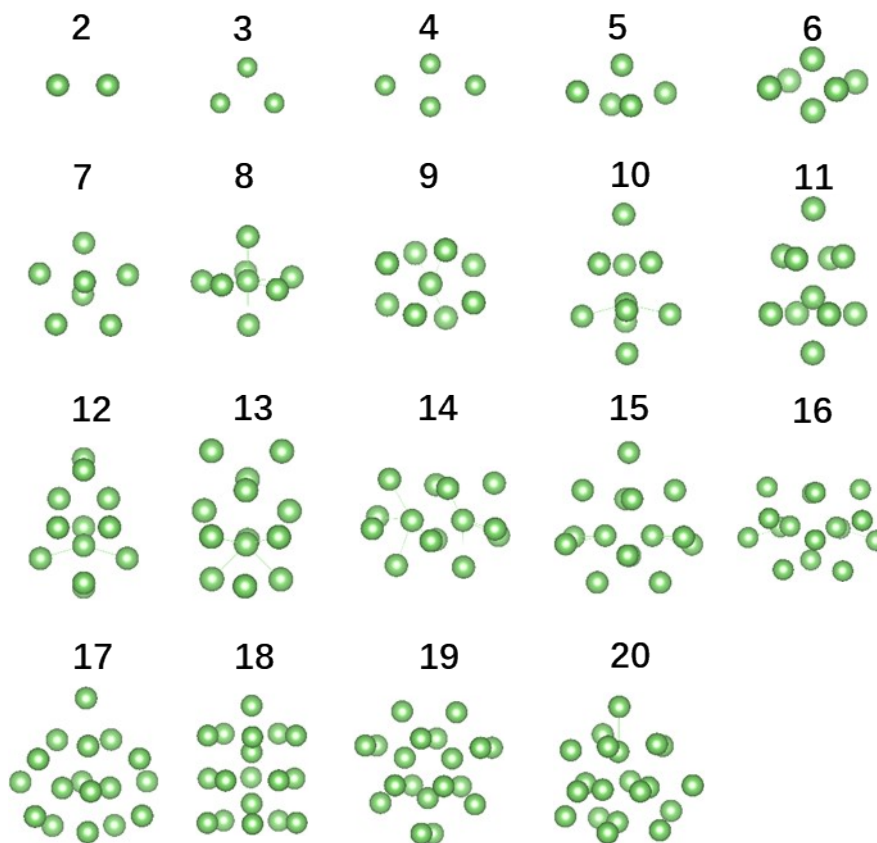

Figure S7. The structures of the optimized  $\text{Li}_n$  ( $n = 2 - 20$ ) clusters.

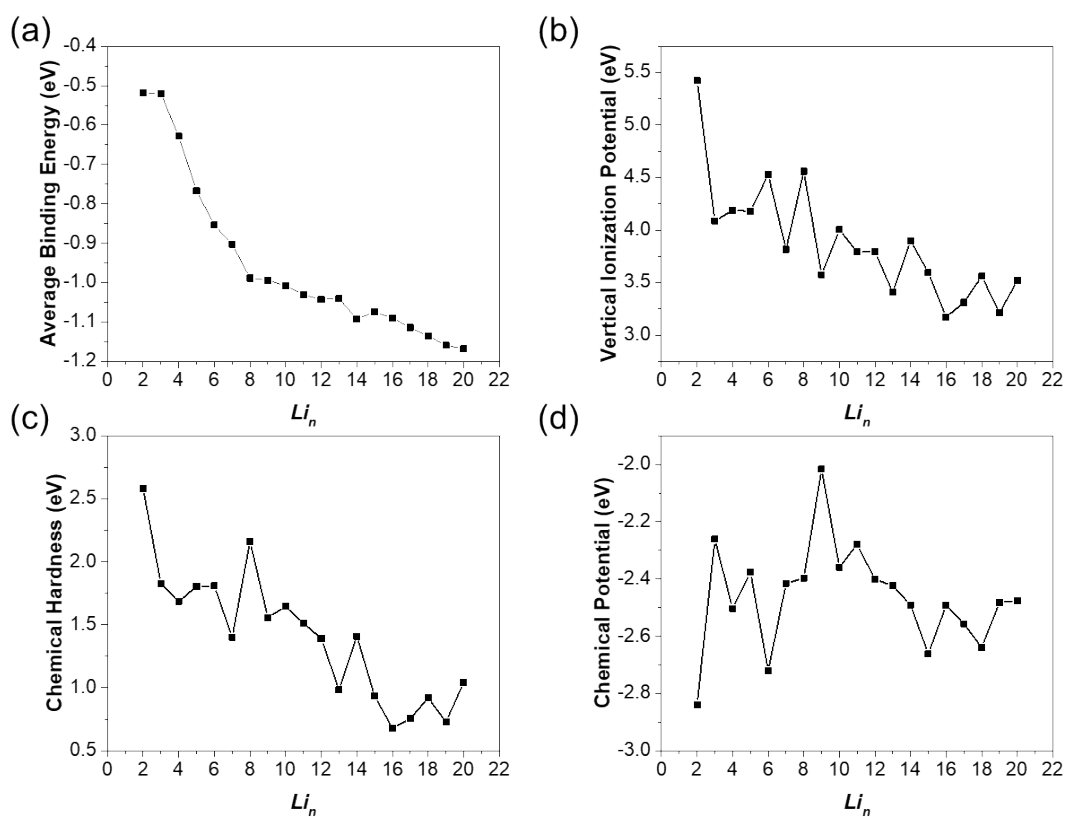

Figure S8. The average binding energy (a), vertical ionization potential (b), chemical hardness (c), and the chemical potential of the Li clusters (d).

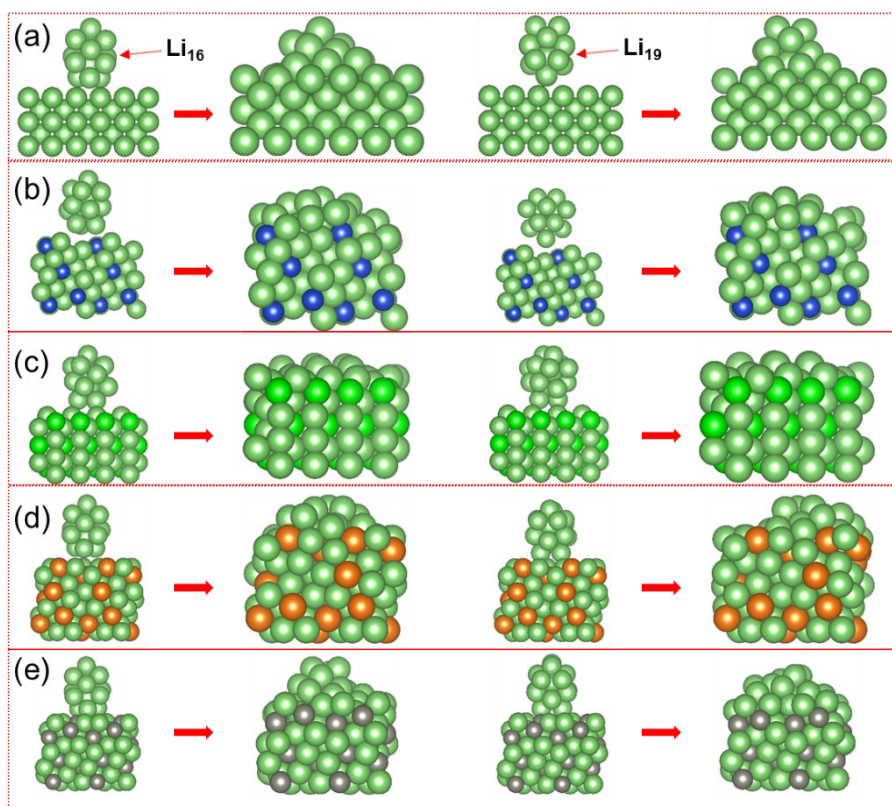

Figure S9. The  $Li_{16}$  and  $Li_{19}$  clusters adsorbed at pure Li (001) (a),  $Li_3Cu$  (111) (b),



$\text{Li}_3\text{Ga}$  (111) (c),  $\text{Li}_3\text{Mg}$  (111) (d) and  $\text{Li}_3\text{Zn}$  (111) surfaces (e). The green atoms are Li, blue atoms are Cu, cyan atoms are Ga, brown atoms are Mg and grey atoms are Zn.

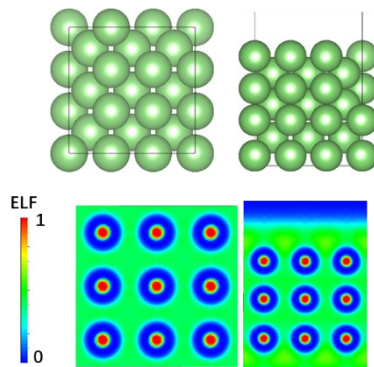

Figure S10. The configuration and electron localization functional of the pure Li (001) surface.

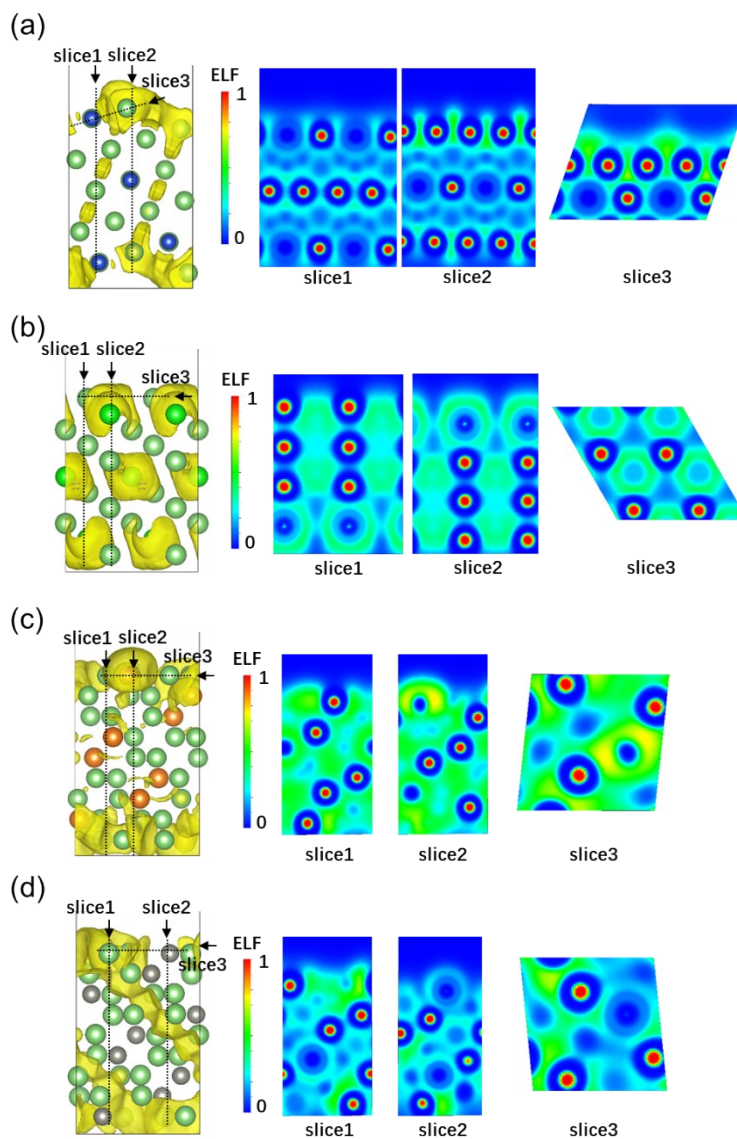

Figure S11. The ELF and corresponding sliced 2D displayed ELF of the  $\text{Li}_3\text{Cu}$  (111)



(a),  $\text{Li}_3\text{Ga}$  (111) (b),  $\text{Li}_3\text{Mg}$  (111) (c) and  $\text{Li}_3\text{Zn}$  (111) surfaces (d). The green atoms are Li, blue atoms are Cu, cyan atoms are Ga, brown atoms are Mg and grey atoms are Zn.

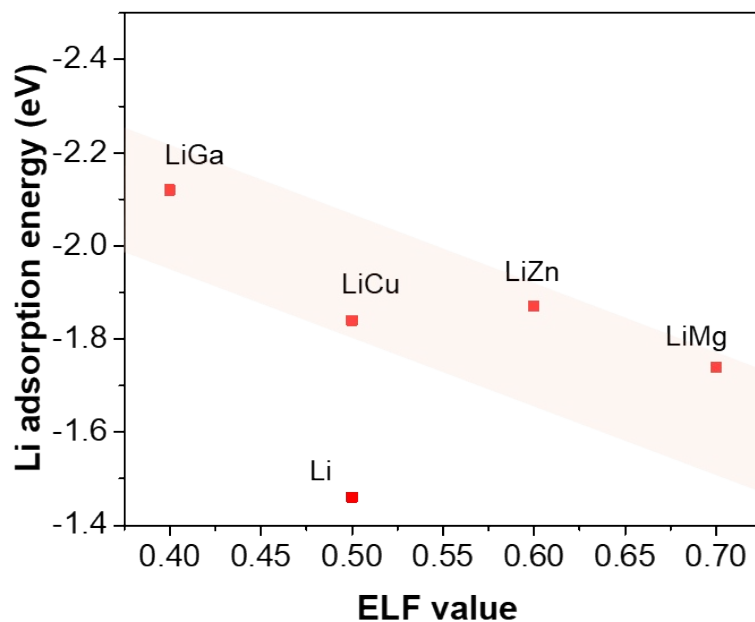

Figure 12. The relationship of highest Li adsorption energy and ELF value.

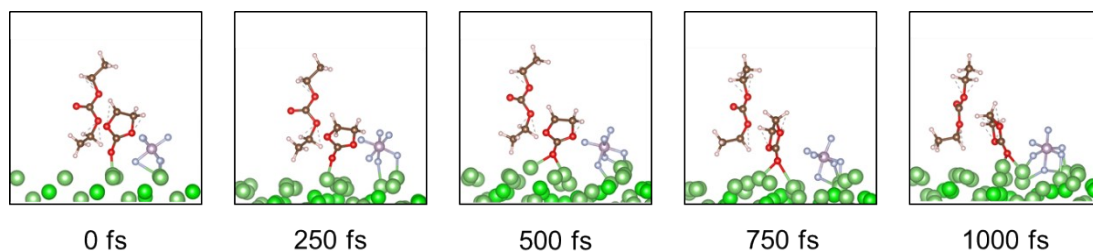

Figure S13. The molecular dynamics at 360 K for simulating the interaction between electrolyte molecules and  $\text{LiGa}$  alloy surface.

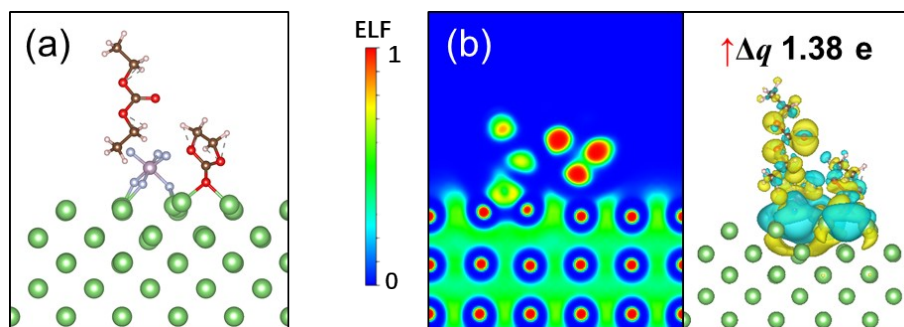

Figure S14. The optimized structure of  $\text{Li}$  (001) with adsorbed electrolyte molecules (a). The corresponding 2D displayed ELF and charge density difference (b). The green atoms are Li, pink atoms are H, the saddle-brown atoms are C, red atoms are O, silver atoms are F and plum atoms are P.

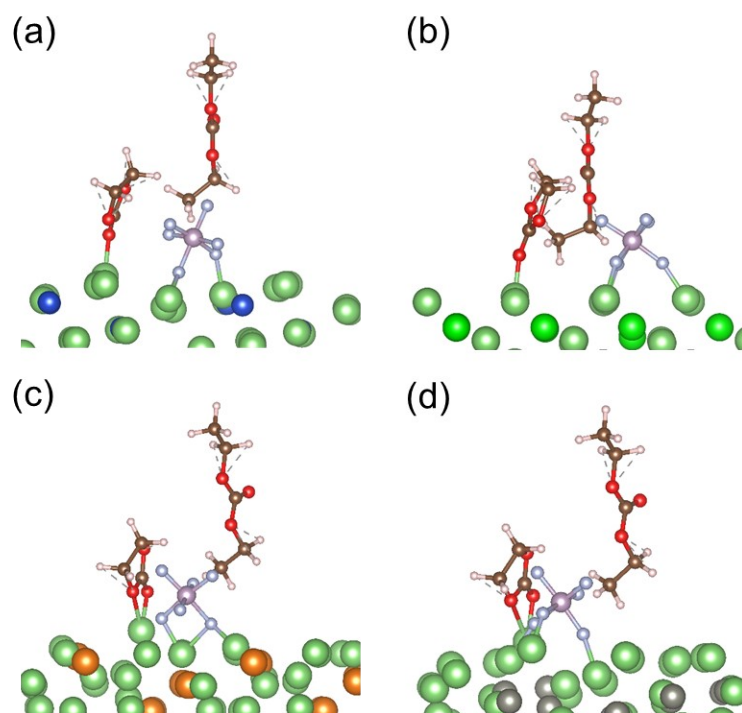

Figure S15. The optimized structure of alloy surfaces with adsorbed electrolyte molecules:  $\text{Li}_3\text{Cu}$  (111) (a),  $\text{Li}_3\text{Ga}$  (111) (b),  $\text{Li}_3\text{Mg}$  (111) (c) and  $\text{Li}_3\text{Zn}$  (111) (d). The green atoms are Li, blue atoms are Cu, cyan atoms are Ga, brown atoms are Mg and grey atoms are Zn, pink atoms are H, the saddle-brown atoms are C, red atoms are O, silver atoms are F and plum atoms are P.

Table S5. The transferred charge on the oxygen atoms in EC within the alloy systems.

|                        | $\text{O}_t$ | $\text{O}_{b1}$ | $\text{O}_{b2}$ |
|------------------------|--------------|-----------------|-----------------|
| $\text{Li}_3\text{Cu}$ | 1.22         | 1.01            | 1.04            |
| $\text{Li}_3\text{Ga}$ | 1.24         | 1.02            | 1.01            |
| $\text{Li}_3\text{Mg}$ | 1.21         | 1.01            | 1.07            |
| $\text{Li}_3\text{Zn}$ | 1.21         | 1.02            | 1.07            |

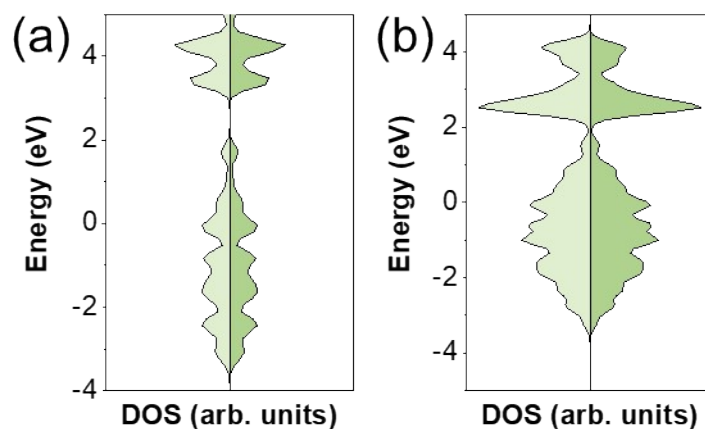

Figure S16. The density of states of the Li *s* orbital in bulk (a) and Li (001) surface (b).

Table S6. The Bader charge of EC and DEC molecules on Li (001) surface.

| EC | Charge   | DEC | Charge   |
|----|----------|-----|----------|
| H  | 0.920388 | H   | 0.960047 |
| H  | 0.888458 | H   | 0.939755 |
| H  | 0.819047 | H   | 0.9427   |
| H  | 0.904753 | H   | 0.947391 |
| C  | 1.882382 | H   | 0.978973 |
| C  | 3.680304 | H   | 0.946888 |
| C  | 3.669961 | H   | 0.95815  |
| O  | 7.327072 | H   | 0.95098  |
| O  | 7.039065 | H   | 0.957928 |
| O  | 7.044682 | H   | 0.963881 |
|    |          | C   | 3.594062 |
|    |          | C   | 1.932769 |
|    |          | C   | 3.599117 |
|    |          | C   | 4.084666 |
|    |          | C   | 4.054022 |
|    |          | O   | 7.051271 |
|    |          | O   | 7.121027 |
|    |          | O   | 7.056847 |

Table S7. The Bader charge of EC and DEC molecules on Li<sub>3</sub>Cu surface.

| EC | Charge   | DEC | Charge   |
|----|----------|-----|----------|
| H  | 0.914277 | H   | 0.9437   |
| H  | 0.921732 | H   | 0.944107 |
| H  | 0.845939 | H   | 0.894089 |
| H  | 0.879369 | H   | 0.942829 |
| C  | 1.894836 | H   | 0.976009 |
| C  | 3.672024 | H   | 0.949917 |
| C  | 3.645194 | H   | 0.971908 |
| O  | 7.226394 | H   | 0.940665 |
| O  | 7.012683 | H   | 0.954936 |
| O  | 7.045591 | H   | 0.963356 |
|    |          | C   | 3.581941 |
|    |          | C   | 1.901887 |
|    |          | C   | 3.655754 |
|    |          | C   | 4.046629 |
|    |          | C   | 4.07545  |
|    |          | O   | 7.054233 |
|    |          | O   | 7.157097 |
|    |          | O   | 7.061957 |

Table S8. The Bader charge of EC and DEC molecules on  $\text{Li}_3\text{Ga}$  surface.

| EC | Charge   | DEC | Charge   |
|----|----------|-----|----------|
| H  | 0.943568 | H   | 0.927329 |
| H  | 0.93731  | H   | 0.911539 |
| H  | 0.882854 | H   | 0.924173 |
| H  | 0.884647 | H   | 0.940091 |
| C  | 1.862994 | H   | 0.943957 |
| C  | 3.607073 | H   | 0.941405 |
| C  | 3.623878 | H   | 0.958097 |
| O  | 7.245723 | H   | 0.954654 |
| O  | 7.020908 | H   | 0.960661 |
| O  | 7.016524 | H   | 0.996574 |
|    |          | C   | 3.636828 |
|    |          | C   | 1.902125 |
|    |          | C   | 3.615695 |
|    |          | C   | 4.100996 |
|    |          | C   | 4.098425 |
|    |          | O   | 7.053707 |
|    |          | O   | 7.15198  |
|    |          | O   | 7.052654 |

Table S9. The Bader charge of EC and DEC molecules on  $\text{Li}_3\text{Mg}$  surface.

| EC | Charge   | DEC | Charge   |
|----|----------|-----|----------|
| H  | 0.894442 | H   | 0.929691 |
| H  | 0.946112 | H   | 0.904868 |
| H  | 0.877274 | H   | 0.897708 |
| H  | 0.876744 | H   | 0.937379 |
| C  | 1.885191 | H   | 0.964254 |
| C  | 3.662103 | H   | 0.952992 |
| C  | 3.615346 | H   | 0.937276 |
| O  | 7.211725 | H   | 0.939578 |
| O  | 7.014666 | H   | 0.967875 |
| O  | 7.069138 | H   | 0.970575 |
|    |          | C   | 3.648618 |
|    |          | C   | 1.888337 |
|    |          | C   | 3.632496 |
|    |          | C   | 4.08014  |
|    |          | C   | 4.095203 |
|    |          | O   | 7.054267 |
|    |          | O   | 7.167811 |
|    |          | O   | 7.056317 |

Table S10. The Bader charge of EC and DEC molecules on Li<sub>3</sub>Zn surface.

| EC | Charge   | DEC | Charge   |
|----|----------|-----|----------|
| H  | 0.901867 | H   | 0.930487 |
| H  | 0.903834 | H   | 0.910724 |
| H  | 0.883049 | H   | 0.890931 |
| H  | 0.87283  | H   | 0.948792 |
| C  | 1.879269 | H   | 0.959497 |
| C  | 3.655194 | H   | 0.952499 |
| C  | 3.669604 | H   | 0.975432 |
| O  | 7.208084 | H   | 0.940626 |
| O  | 7.020287 | H   | 0.955036 |
| O  | 7.072674 | H   | 0.986589 |
|    |          | C   | 3.674296 |
|    |          | C   | 1.889685 |
|    |          | C   | 3.634682 |
|    |          | C   | 4.02537  |
|    |          | C   | 4.1209   |
|    |          | O   | 7.039799 |
|    |          | O   | 7.162742 |
|    |          | O   | 7.068001 |
